# Supplementary material
Source: MDPI journal article supplement (https://www.mdpi.com/2220-9964/8/5/217)
Supplement: s1 [file s1]

Supplementary Material for the Article:

## Why Shape Matters - On the Inherent Qualities of Geometric Shapes for Cartographic Representations

Table S1. Hierarchical agglomerative cluster analysis dissimilarity matrix. Frequencies according to Phi-Square.

| Case               | Proximity Matrix<br>Phi-square between Sets of Frequencies |                    |                    |                  |            |          |             |            |          |           |           |                |
|--------------------|------------------------------------------------------------|--------------------|--------------------|------------------|------------|----------|-------------|------------|----------|-----------|-----------|----------------|
|                    | 1:Circle                                                   | 2:One_point_circle | 3:Semicircle_small | 4:Semicircle_big | 5:Triangle | 6:Square | 7: Pentagon | 8: Octagon | 9:Star_4 | 10:Star_5 | 11:Star_8 | 12:Star_spiked |
| 1:Circle           | ,000                                                       | ,536               | ,541               | ,524             | ,642       | ,688     | ,655        | ,673       | ,837     | ,811      | ,803      | ,775           |
| 2:One_point_circle | ,536                                                       | ,000               | ,509               | ,592             | ,682       | ,761     | ,794        | ,749       | ,824     | ,826      | ,819      | ,664           |
| 3:Semicircle_small | ,541                                                       | ,509               | ,000               | ,692             | ,805       | ,820     | ,876        | ,809       | ,924     | ,886      | ,899      | ,799           |
| 4:Semicircle_big   | ,524                                                       | ,592               | ,692               | ,000             | ,781       | ,810     | ,849        | ,768       | ,953     | ,919      | ,933      | ,784           |
| 5:Triangle         | ,642                                                       | ,682               | ,805               | ,781             | ,000       | ,360     | ,396        | ,325       | ,809     | ,802      | ,795      | ,692           |
| 6:Square           | ,688                                                       | ,761               | ,820               | ,810             | ,360       | ,000     | ,483        | ,405       | ,945     | ,887      | ,899      | ,831           |
| 7:Pentagon         | ,655                                                       | ,794               | ,876               | ,849             | ,396       | ,483     | ,000        | ,578       | ,893     | ,882      | ,858      | ,832           |
| 8:Octagon          | ,673                                                       | ,749               | ,809               | ,768             | ,325       | ,405     | ,578        | ,000       | ,878     | ,839      | ,856      | ,781           |
| 9:Star_4           | ,837                                                       | ,824               | ,924               | ,953             | ,809       | ,945     | ,893        | ,878       | ,000     | ,537      | ,505      | ,518           |
| 10:Star_5          | ,811                                                       | ,826               | ,886               | ,919             | ,802       | ,887     | ,882        | ,839       | ,537     | ,000      | ,574      | ,542           |
| 11:Star_8          | ,803                                                       | ,819               | ,899               | ,933             | ,795       | ,899     | ,858        | ,856       | ,505     | ,574      | ,000      | ,505           |
| 12:Star_spiked     | ,775                                                       | ,664               | ,799               | ,784             | ,692       | ,831     | ,832        | ,781       | ,518     | ,542      | ,505      | ,000           |

This is a dissimilarity matrix

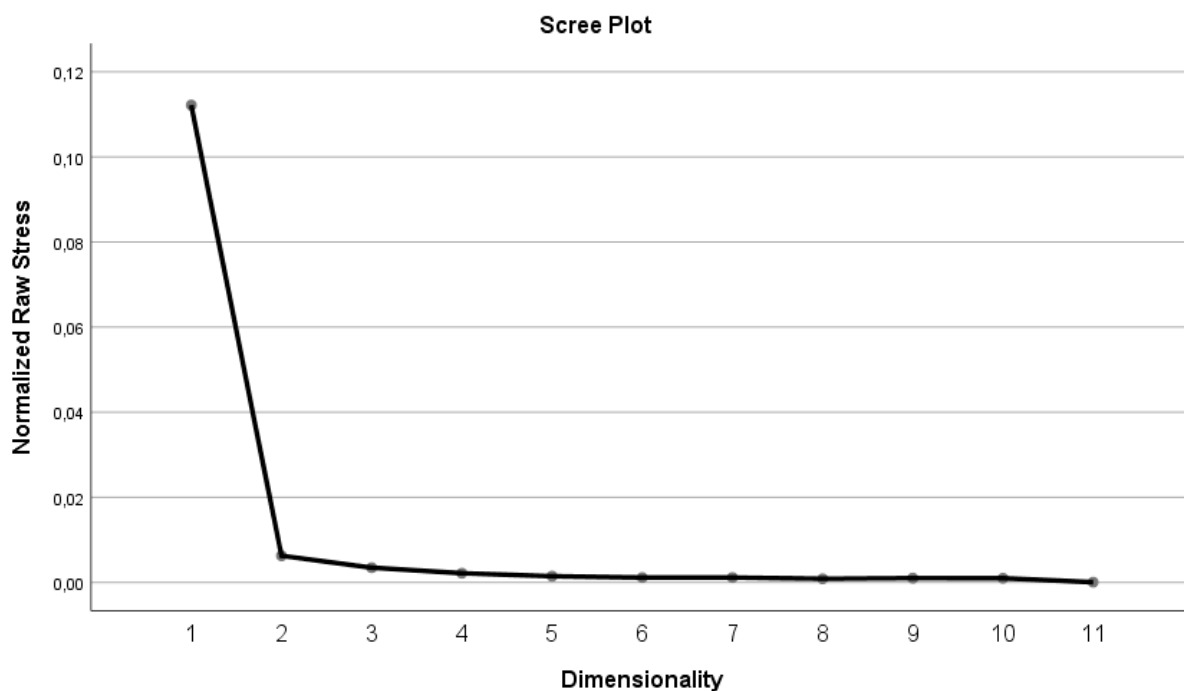

**Figure 1.** Scree plot based on PROXSCAL MDS for ordinal data, based on the 12x12 co-occurrence matrix, indicating a two-dimensional configuration.

**Table S2.** Goodness of Fit for a two-dimensional MDS configuration, based on a 12x12 co-occurrence matrix.

| Stress and Fit Measures            |                     |
|------------------------------------|---------------------|
| Normalized Raw Stress              | ,00604              |
| Stress-I                           | ,07770 <sup>a</sup> |
| Stress-II                          | ,16993 <sup>a</sup> |
| S-Stress                           | ,01483 <sup>b</sup> |
| Dispersion Accounted For (D.A.F.)  | ,99396              |
| Tucker's Coefficient of Congruence | ,99698              |

PROXSCAL minimizes Normalized Raw Stress.

a. Optimal scaling factor = 1,006.

b. Optimal scaling factor = ,997.

**Table S3.** Coordinates for Common Space by applying a two-dimensional MDS configuration, based on a 12x12 co-occurrence matrix.

|                  | Final Coordinates |       |
|------------------|-------------------|-------|
|                  | Dimension         |       |
|                  | 1                 | 2     |
| Circle           | -,199             | ,436  |
| One_point_circle | -,107             | ,629  |
| Semicircle_small | -,240             | ,682  |
| Semicircle_big   | -,328             | ,696  |
| Triangle         | -,342             | -,511 |
| Square           | -,554             | -,425 |
| Pentagon         | -,452             | -,567 |
| Ocatogon         | -,458             | -,467 |
| Star_4           | ,733              | -,136 |
| Star_5           | ,682              | -,176 |
| Star_8           | ,688              | -,186 |
| Star_spiked      | ,578              | ,024  |

**Table S4.** Excerpt of the inductive category formation process and coding results of coder 1 (translated from German). Coding scheme: C – Cartographic associations, O – Object associations, E – Evaluative-Affective responses (valence, dominance, arousal), H – (visual) Hierarchy, S – (visual) Symbiosis/Containment, F – Figurative description.

| ID  | Group | Condensation of the retrospective verbalizations – task 2                 | Transcriptions of (hand written) free-labeling – task 3 | Coding – task 2 & 3 | Category            |
|-----|-------|---------------------------------------------------------------------------|---------------------------------------------------------|---------------------|---------------------|
| 1   | 1     | A “here I am”-point                                                       | <i>Position marker</i>                                  | C                   | Association         |
|     | 2     | Symbols to indicate locations                                             | <i>Symbols for favorites</i>                            | C                   | Association         |
| ... | ...   | ...                                                                       | ...                                                     | ...                 | ...                 |
| 3   | 1     | Shapes with edges, traffic signs                                          | <i>edgy</i>                                             | F, O                | Visual, Association |
|     | 2     | Curves                                                                    | <i>curvy</i>                                            | F                   | Visual              |
| ... | ...   | ...                                                                       | ...                                                     | ...                 | ...                 |
| 35  | 2     | Basic shapes                                                              | <i>Basic shapes</i>                                     | H                   | Visual              |
|     | 3     | Cartographic markers                                                      | <i>(Point-)markers</i>                                  | C                   | Association         |
|     | 4     | This is anything & nothing, different from the others, rather non-special | <i>rounded</i>                                          | E, F                | Evaluation, Visual  |
|     | 5     | Rather aggressive                                                         | <i>prickly</i>                                          | E                   | Evaluation          |
| ... | ...   | ...                                                                       | ...                                                     | ...                 | ...                 |
| 38  | 6     | Pointing the way                                                          | <i>pointing the way</i>                                 | E                   | Evaluation          |

**Table S5.** Cross-tabulation of female versus male responses of the three strategies identified, based on results of coder 1 (n = 19 females, n = 19 males).

| <b>Counts of female versus male responses of codes (labels) based on coder 1</b> |   |            |           |           |             |        |            |       |
|----------------------------------------------------------------------------------|---|------------|-----------|-----------|-------------|--------|------------|-------|
| <b>Cross-tabulation</b>                                                          |   |            |           |           |             |        |            |       |
| Codes (labels) and categories assigned based on coder 1                          |   |            |           |           |             |        |            |       |
|                                                                                  |   | visual     |           |           | associative |        | evaluative | Total |
|                                                                                  |   | figurative | symbiosis | hierarchy | cartography | object | evaluation | Total |
| female / male                                                                    | f | 55         | 1         | 10        | 6           | 11     | 19         | 102   |
|                                                                                  | m | 52         | 2         | 12        | 17          | 18     | 19         | 120   |
| Total                                                                            |   | 107        | 3         | 22        | 23          | 29     | 38         | 222   |
| Total by strategy                                                                |   |            | 132       |           | 52          |        | 38         |       |
